# Supplementary material
Source: ML conference proceedings conference paper supplement (https://openaccess.thecvf.com/content/CVPR2024/html/Melnyk_TetraSphere_A_Neural_CVPR_2024_paper.html)
Supplement: Supplementary file 1 [file Melnyk_TetraSphere_A_Neural_CVPR_2024_supplemental.pdf]

# TetraSphere: A Neural Descriptor for O(3)-Invariant Point Cloud Analysis

## Supplementary Material

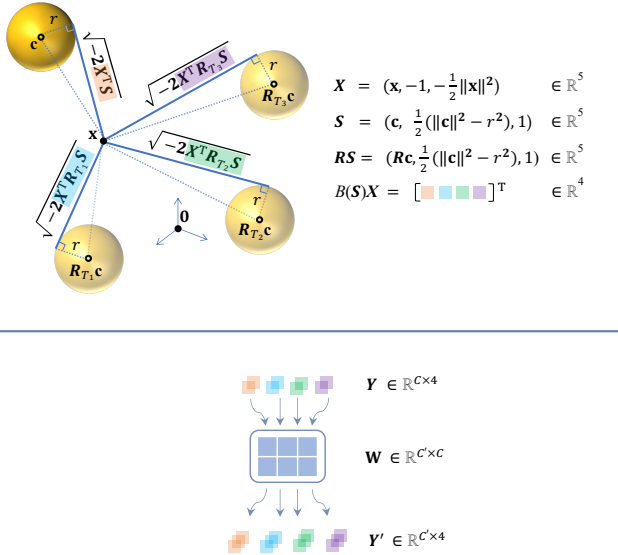

Figure 4. (Best viewed in color.) **Top:** Tetra-basis projection is the output of a steerable 3D spherical neuron [28]. Without loss of generality, consider one ( $K = 1$ ) steerable spherical neuron  $B(S)$  (see Section 3.3) with  $R_O = I_5$ , and the input point  $x$  that happens to lie outside of the sphere ( $c, r$ ) with the learnable parameter vector  $S$  (assume  $\gamma = 1$ , and thus  $\tilde{S} = S$ ; see Section 3.2) and its three rotated copies. Then the projection of  $x$  in the tetra-basis  $B(S)$  is the vector  $B(S)X$  consisting of four scalar activations  $X^T R_{T_i} S$  of the respective spherical decision surfaces. Each activation determines the respective cathetus length, as per [27]. **Bottom:** Vector neurons [10] preserve the spatial dimension (4 in our case) and alter the latent dimension  $C$  of the feature  $Y$ , see (10).

### 7. Additional illustrations

In order to help the reader to understand the main concepts of our approach, *i.e.*, prior work (steerable) spherical neurons [28] and vector neurons [10], as well as 4D tetra-basis projections (see Figure 1 and Section 4.1), we provide illustrations in Figure 4.

### 8. Learned Tetra-selection

In this section, we present the Tetra-selection discussed in Section 5.3. As we can see from Figures 5 and 6, **TetraSphere** learns all but one  $\gamma$  parameter of the spherical decision surface (see (5)), defining the steerable neuron (6), to be close to 0, effectively always selecting one tetra-basis (out of  $K$ ) during inference. We attribute the increased performance for  $K > 1$  (see Tables 1, 2, and 3), to the higher chance of selecting a better initialization of the steerable neuron parameters.

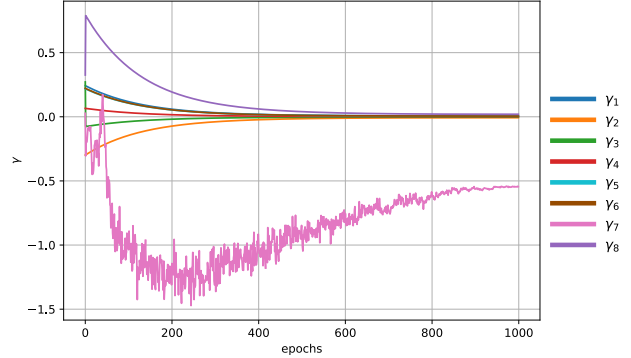

Figure 5. Learned  $\gamma$  parameters for **TetraSphere** $_{K=8}$  trained on the *OBJ\_BG* subset of ScanObjectNN (see Table 1). All but  $\gamma_7$  converge close to 0.

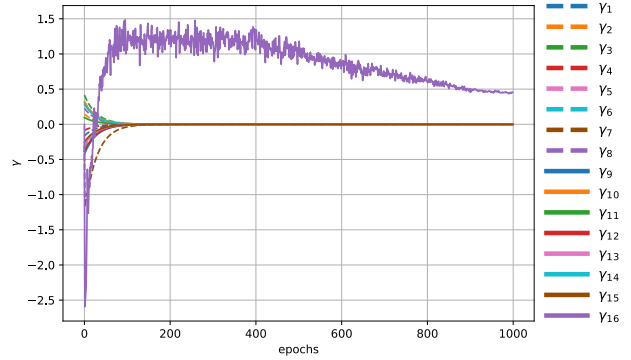

Figure 6. Learned  $\gamma$  parameters for **TetraSphere** $_{K=16}$  trained on the *PB\_T50\_RS* (see Table 2) of ScanObjectNN. All but  $\gamma_{16}$  converge close to 0.

### 9. Synthetic data results

We present a complete comparison of the methods trained on synthetic data to perform classification and part segmentation in Tables 5 and 6, respectively. Our **TetraSphere** achieves the best performance among equivariant methods in both tasks, consistently outperforming VN-DGCNN.

Only the two RI methods PaRINet [6] and Yu *et al.* [48] outperform tetrasphere in the former case and only PaRINet in the latter. Note that TetraSphere outperforms both PaRINet and Yu *et al.* on the other two real-data benchmarks (see Tables 1 and 2).

| Methods                                         | $z/z$       | $z/\text{SO}(3)$ | $\text{SO}(3)/\text{SO}(3)$ |
|-------------------------------------------------|-------------|------------------|-----------------------------|
| Rotation-sensitive                              |             |                  |                             |
| PointCNN [25]                                   | <b>92.5</b> | 41.2             | 84.5                        |
| DGCNN [41]                                      | 90.3        | 33.8             | 88.6                        |
| Rotation-invariant                              |             |                  |                             |
| 3D-GFE [8]                                      | 88.6        | 89.4             | 89.0                        |
| Li <i>et al.</i> [23]                           | 90.2        | 90.2             | 90.2                        |
| Yu <i>et al.</i> [48]                           | 91.0        | <u>91.0</u>      | <u>91.0</u>                 |
| PaRINet [6]                                     | <u>91.4</u> | <b>91.4</b>      | <b>91.4</b>                 |
| Rotation-equivariant                            |             |                  |                             |
| TFN [31]                                        | 89.7        | 89.7             | 89.7                        |
| VN-DGCNN [10]                                   | 89.5        | 89.5             | 90.2                        |
| <b>TetraSphere</b> <sub><math>K=1</math></sub>  | 89.5        | 89.5             | 89.9                        |
| <b>TetraSphere</b> <sub><math>K=2</math></sub>  | 89.7        | 89.7             | 90.0                        |
| <b>TetraSphere</b> <sub><math>K=4</math></sub>  | 90.0        | 90.0             | 89.5                        |
| <b>TetraSphere</b> <sub><math>K=8</math></sub>  | 90.5        | 90.5             | 90.3                        |
| <b>TetraSphere</b> <sub><math>K=16</math></sub> | 89.8        | 89.8             | 90.0                        |

Table 5. Classification acc. (%) on the ModelNet40 shapes under different train/test settings of rotation augmentation. The overall best results are presented in **bold**, and the second best are underlined. Our **TetraSphere** sets a new state-of-the-art performance for equivariant baselines.

| Methods                                         | $z/z$       | $z/\text{SO}(3)$ | $\text{SO}(3)/\text{SO}(3)$ |
|-------------------------------------------------|-------------|------------------|-----------------------------|
| Rotation-sensitive                              |             |                  |                             |
| PointCNN [25]                                   | <b>84.6</b> | 34.7             | 71.4                        |
| DGCNN [41]                                      | 82.3        | 37.4             | 73.3                        |
| Rotation-invariant                              |             |                  |                             |
| 3D-GFE [8]                                      | -           | 78.2             | 77.7                        |
| Li <i>et al.</i> [23]                           | 81.7        | 81.7             | 81.7                        |
| PaRINet [6]                                     | <u>83.8</u> | <b>83.8</b>      | <b>83.8</b>                 |
| Yu <i>et al.</i> [48]                           | -           | 80.3             | 80.4                        |
| Rotation-equivariant                            |             |                  |                             |
| TFN [31]                                        | -           | 78.1             | 78.2                        |
| VN-DGCNN [10]                                   | 81.4        | 81.4             | 81.4                        |
| <b>TetraSphere</b> <sub><math>K=1</math></sub>  | 82.1        | 82.1             | 82.3                        |
| <b>TetraSphere</b> <sub><math>K=2</math></sub>  | 82.3        | 82.3             | 82.5                        |
| <b>TetraSphere</b> <sub><math>K=4</math></sub>  | 82.2        | 82.2             | 82.2                        |
| <b>TetraSphere</b> <sub><math>K=8</math></sub>  | 82.3        | 82.3             | 82.4                        |
| <b>TetraSphere</b> <sub><math>K=16</math></sub> | 82.3        | 82.3             | 82.3                        |

Table 6. Part segmentation: ShapeNet mIoU (%). The overall best results are presented in **bold**, and the second best are underlined. Our **TetraSphere** sets a new state-of-the-art performance for equivariant baselines.
